# Supplementary material
Source: PubMed Central journal article supplement (PMC10527151)
Supplement: NIHMS1906797-supplement-Supplemental_Material.pdf [file NIHMS1906797-supplement-Supplemental_Material.pdf]

## Supplementary Information

Table S1

*Summary of the Included Reports in Meta-analysis*

*See mbi\_hivmeta\_data\_202303.xlsx*

## References of the Included Reports

- Aharonovich, E., Stohl, M., Cannizzaro, D., & Hasin, D. (2017). HealthCall delivered via smartphone to reduce co-occurring drug and alcohol use in HIV-infected adults: A randomized pilot trial. *Journal of Substance Abuse Treatment, 83*, 15–26.  
<https://doi.org/10.1016/j.jsat.2017.09.013>
- Amaro, H., Larson, M. J., Zhang, A., Acevedo, A., Dai, J., & Matsumoto, A. (2007). Effects of trauma intervention on HIV sexual risk behaviors among women with co-occurring disorders in substance abuse treatment. *Journal of Community Psychology, 35*(7), 895–908.  
<https://doi.org/10.1002/jcop.20188>
- Amirkhanian, Y. A., Kelly, J. A., Kabakchieva, E., Kirsanova, A. V., Vassileva, S., Takacs, J., DiFranceisco, W. J., McAuliffe, T. L., Khoursine, R. A., & Mocsonaki, L. (2005). A randomized social network HIV prevention trial with young men who have sex with men in Russia and Bulgaria. *AIDS (London, England), 19*(16), 1897–1905.  
<https://doi.org/10.1097/01.aids.0000189867.74806.fb>
- Anand, T., Nitpolprasert, C., Jantarapakde, J., Meksen, R., Phomthong, S., Phoseeta, P., Phanuphak, P., & Phanuphak, N. (2020). Implementation and impact of a technology-based HIV risk-reduction intervention among Thai men who have sex with men using “Vialogues”: a randomized controlled trial. *AIDS Care, 32*(3), 394–405.  
<https://doi.org/10.1080/09540121.2019.1622638>
- Andersson, C. (2020). Personalized normative feedback interventions targeting hazardous alcohol use and alcohol-related risky sexual behavior in Swedish university students: A randomized controlled replication trial. *Addictive Behaviors Reports, 12*, 100300.  
<https://doi.org/10.1016/j.abrep.2020.100300>

- Avants, S. K., Margolin, A., Usubiaga, M. H., & Doebrick, C. (2004). Targeting HIV-related outcomes with intravenous drug users maintained on methadone: A randomized clinical trial of a harm reduction group therapy. *Journal of Substance Abuse Treatment, 26*(2), 67–78. [https://doi.org/10.1016/S0740-5472\(03\)00159-4](https://doi.org/10.1016/S0740-5472(03)00159-4)
- Bahromov, M., & Weine, S. (2011). HIV prevention for migrants in transit: developing and testing TRAIN. *AIDS Education and Prevention, 23*(3), 267–280. <https://doi.org/10.1521/aeap.2011.23.3.267>
- Bailey, R. C., Moses, S., Parker, C. B., Agot, K., Maclean, I., Krieger, J. N., Williams, C. F. M., Campbell, R. T., & Ndinya-Achola, J. O. (2007). Male circumcision for HIV prevention in young men in Kisumu, Kenya: a randomised controlled trial. *Lancet (London, England), 369*(9562), 643–656. [https://doi.org/10.1016/S0140-6736\(07\)60312-2](https://doi.org/10.1016/S0140-6736(07)60312-2)
- Barnett, P. G., Sorensen, J. L., Wong, W., Haug, N. A., & Hall, S. M. (2009). Effect of incentives for medication adherence on health care use and costs in methadone patients with HIV. *Drug and Alcohol Dependence, 100*(1–2), 115–121. <https://doi.org/10.1016/j.drugalcdep.2008.09.017>
- Berrien, V. M., Salazar, J. C., Reynolds, E., & McKay, K. (2004). Adherence to antiretroviral therapy in HIV-infected pediatric patients improves with home-based intensive nursing intervention. *AIDS Patient Care and STDs, 18*(6), 355–363. <https://doi.org/10.1089/1087291041444078>
- Borawski, E. A., Trapl, E. S., Lovegreen, L. D., Colabianchi, N., & Block, T. (2005). Effectiveness of abstinence-only intervention in middle school teens. *American Journal of Health Behavior, 29*(5), 423–434. <https://doi.org/10.5993/AJHB.29.5.5>

- Boyer, C. B., Shafer, M. A., & Tschann, J. M. (1997). Evaluation of a knowledge- and cognitive-behavioral skills-building intervention to prevent STDs and HIV infection in high school students. *Adolescence*, 32(125), 25–42.
- Boyer, C. B., Shafer, M.-A., Shaffer, R. A., Brodine, S. K., Pollack, L. M., Betsinger, K., Chang, Y. J., Kraft, H. S., & Schachter, J. (2005). Evaluation of a cognitive-behavioral, group, randomized controlled intervention trial to prevent sexually transmitted infections and unintended pregnancies in young women. *Preventive Medicine*, 40(4), 420–431.  
<https://doi.org/10.1016/j.ypmed.2004.07.004>
- Brawner, B. M., Jemmott, L. S., Wingood, G., Lozano, A. J., & Hanlon, A. L. (2019). Project GOLD: A pilot randomized controlled trial of a novel psychoeducational HIV/STI prevention intervention for heterosexually-active black youth. *Research in Nursing & Health*, 42(1), 8–28. <https://doi.org/10.1002/nur.21930>
- Brown, L. K., Chernoff, M., Kennard, B. D., Emslie, G. J., Lypen, K., Buisson, S., Weinberg, A., Whiteley, L. B., Traite, S., Krotje, C., Harriff, L., Townley, E., Bunch, A., Purswani, M., Shaw, R., Spector, S. A., Agwu, A., Shapiro, D. E., & IMPAACT 2002 team. (2021). Site-randomized controlled trial of a combined cognitive behavioral therapy and a medication management algorithm for treatment of depression among youth living with HIV in the United States. *Journal of Acquired Immune Deficiency Syndromes (1999)*, 88(5), 497–505.  
<https://doi.org/10.1097/QAI.0000000000002790>
- Burke, H. M., Chen, M., Murray, K., Bezuidenhout, C., Ngwepe, P., Bernholc, A., & Medina-Marino, A. (2020). The effects of the integration of an economic strengthening and HIV prevention education programme on the prevalence of sexually transmitted infections and

savings behaviours among adolescents: a full-factorial randomised controlled trial in South Africa. *BMJ Global Health*, 5(4), e002029. <https://doi.org/10.1136/bmjgh-2019-002029>

Cade, W. T., Reeds, D. N., Mondy, K. E., Overton, E. T., Grassino, J., Tucker, S., Bopp, C., Laciny, E., Hubert, S., Lassa-Claxton, S., & Yarasheski, K. E. (2010). Yoga lifestyle intervention reduces blood pressure in HIV-infected adults with cardiovascular disease risk factors. *HIV Medicine*, 11(6), 379–388. <https://doi.org/10.1111/j.1468-1293.2009.00801.x>

Calsyn, D. A., Hatch-Maillette, M., Tross, S., Doyle, S. R., Crits-Christoph, P., Song, Y. S., Harrer, J. M., Lalos, G., & Berns, S. B. (2009). Motivational and skills training HIV/sexually transmitted infection sexual risk reduction groups for men. *Journal of Substance Abuse Treatment*, 37(2), 138–150. <https://doi.org/10.1016/j.jsat.2008.11.008>

Carey, M. P., Rich, C., Norris, A. L., Krieger, N., Gavarkovs, A. G., Kaplan, C., Guthrie, K. M., & Carey, K. B. (2020). A brief clinic-based intervention to reduce alcohol misuse and sexual risk behavior in young women: results from an exploratory clinical trial. *Archives of Sexual Behavior*, 49(4), 1231–1250. <https://doi.org/10.1007/s10508-020-01635-9>

Carrico, A. W., Antoni, M. H., Duran, R. E., Ironson, G., Penedo, F., Fletcher, M. A., Klimas, N., & Schneiderman, N. (2006). Reductions in depressed mood and denial coping during cognitive behavioral stress management with HIV-Positive gay men treated with HAART. *Annals of Behavioral Medicine*, 31(2), 155–164. [https://doi.org/10.1207/s15324796abm3102\\_7](https://doi.org/10.1207/s15324796abm3102_7)

Celio, M. A., Mastroleo, N. R., Barnett, N. P., Colby, S. M., Kahler, C. W., Operario, D., & Monti, P. M. (2019). Mechanisms of behavior change in a brief dual-target motivational intervention: Reduction in alcohol use mediates intervention effects on risky sex. *Psychology of Addictive Behaviors*, 33(4), 349–359. <https://doi.org/10.1037/adb0000461>

- Chernoff, R. A., & Davison, G. C. (2005). An evaluation of a brief HIV/AIDS prevention intervention for college students using normative feedback and goal setting. *AIDS Education and Prevention, 17*(2), 91–104. <https://doi.org/10.1521/aeap.17.3.91.62902>
- Chiou, P.-Y., Kuo, B. I.-T., Lee, M.-B., Chen, Y.-M., Chuang, P., & Lin, L.-C. (2006). A programme of symptom management for improving quality of life and drug adherence in AIDS/HIV patients. *Journal of Advanced Nursing, 55*(2), 169–179. <https://doi.org/10.1111/j.1365-2648.2006.03902.x>
- Cianelli, R., Ferrer, L., Norr, K. F., Miner, S., Irrarrazabal, L., Bernales, M., Peragallo, N., Levy, J., Norr, J. L., & McElmurry, B. (2012). Mano a Mano-Mujer: an effective HIV prevention intervention for Chilean women. *Health Care for Women International, 33*(4), 321–341. <https://doi.org/10.1080/07399332.2012.655388>
- Cornman, D. H., Schmiede, S. J., Bryan, A., Benziger, T. J., & Fisher, J. D. (2007). An information-motivation-behavioral skills (IMB) model-based HIV prevention intervention for truck drivers in India. *Social Science & Medicine (1982), 64*(8), 1572–1584. <https://doi.org/10.1016/j.socscimed.2006.11.011>
- da Costa, T. M., Barbosa, B. J. P., e Costa, D. A. G., Sigulem, D., de Fátima Marin, H., Filho, A. C., & Pisa, I. T. (2012). Results of a randomized controlled trial to assess the effects of a mobile SMS-based intervention on treatment adherence in HIV/AIDS-infected Brazilian women and impressions and satisfaction with respect to incoming messages. *International Journal of Medical Informatics, 81*(4), 257–269. <https://doi.org/10.1016/j.ijmedinf.2011.10.002>

- da Silveira, M. F., & dos Santos, I. S. (2006). Impact of an educational intervention to promote condom use among the male partners of HIV positive women. *Journal of Evaluation in Clinical Practice*, 12(1), 102–111. <https://doi.org/10.1111/j.1365-2753.2005.00626.x>
- Darbes, L. A., McGrath, N. M., Hosegood, V., Johnson, M. O., Fritz, K., Ngubane, T., & van Rooyen, H. (2019). Results of a couples-based randomized controlled trial aimed to increase testing for HIV. *Journal of Acquired Immune Deficiency Syndromes (1999)*, 80(4), 404–413. <https://doi.org/10.1097/QAI.0000000000001948>
- Dévieux, J. G., Rosenberg, R., Jean-Gilles, M., Villalba, K., Attonito, J., Lerner, B., Saxena, A., & Stein, J. (2022). Effectiveness of a cognitive behavioral randomized controlled trial for people living with HIV who are heavy drinkers: the Holistic Health Recovery Program (HHRP) trial in Miami. *Journal of Clinical Psychology in Medical Settings*, 29(3), 498–508. <https://doi.org/10.1007/s10880-022-09878-5>
- DiClemente, R. J., Wingood, G. M., Harrington, K. F., Lang, D. L., Davies, S. L., Hook III, E. W., Oh, M. K., Crosby, R. A., Hertzberg, V. S., Gordon, A. B., Hardin, J. W., Parker, S., & Robillard, A. (2004). Efficacy of an HIV prevention intervention for African American adolescent girls. *JAMA*, 292(2), 171. <https://doi.org/10.1001/jama.292.2.171>
- Dilley, J. W., Woods, W. J., Sabatino, J., Lihathsh, T., Adler, B., Casey, S., Rinaldi, J., Brand, R., & McFarland, W. (2002). Changing sexual behavior among gay male repeat testers for HIV: a randomized, controlled trial of a single-session intervention. *Journal of Acquired Immune Deficiency Syndromes (1999)*, 30(2), 177–186. <https://doi.org/10.1097/00042560-200206010-00006>

- Donenberg, G., Emerson, E., & Kendall, A. D. (2018). HIV-risk reduction intervention for juvenile offenders on probation: The PHAT Life group randomized controlled trial. *Health Psychology, 37*(4), 364–374. <https://doi.org/10.1037/hea0000582>
- Dushay, R. A., Singer, M., Weeks, M. R., Rohena, L., & Gruber, R. (2001). Lowering HIV risk among ethnic minority drug users: comparing culturally targeted intervention to a standard intervention. *The American Journal of Drug and Alcohol Abuse, 27*(3), 501–524. <https://doi.org/10.1081/ada-100104515>
- Eaton, L. A., Kalichman, S. C., Kalichman, M. O., Driffin, D. D., Baldwin, R., Zohren, L., & Conway-Washington, C. (2018). Randomised controlled trial of a sexual risk reduction intervention for STI prevention among men who have sex with men in the USA. *Sexually Transmitted Infections, 94*(1), 40–45. <https://doi.org/10.1136/sextrans-2016-052835>
- El-Bassel, N., Witte, S. S., Gilbert, L., Wu, E., Chang, M., Hill, J., & Steinglass, P. (2003). The efficacy of a relationship-based HIV/STD prevention program for heterosexual couples. *American Journal of Public Health, 93*(6), 963–969. <https://doi.org/10.2105/ajph.93.6.963>
- Feaster, D. J., Mitrani, V. B., Burns, M. J., McCabe, B. E., Brincks, A. M., Rodriguez, A. E., Asthana, D., & Robbins, M. S. (2010). A randomized controlled trial of Structural Ecosystems Therapy for HIV medication adherence and substance abuse relapse prevention. *Drug and Alcohol Dependence, 111*(3), 227–234. <https://doi.org/10.1016/j.drugalcdep.2010.04.017>
- Firestone, R., Moorsmith, R., James, S., Urey, M., Greifinger, R., Lloyd, D., Hartenberger-Toby, L., Gausman, J., & Sanoe, M. (2016). Intensive group learning and on-site services to improve sexual and reproductive health among young adults in Liberia: a randomized



evaluation of HealthyActions. *Global Health, Science and Practice*, 4(3), 435–451.

<https://doi.org/10.9745/GHSP-D-16-00074>

Fladeboe, K. M., Scott, S., Bradford, M. C., Ketterl, T. G., Yi-Frazier, J. P., & Rosenberg, A. R.

(2020). Sexual activity and substance use among adolescents and young adults receiving cancer treatment: a report from the prism randomized controlled trial. *Journal of Adolescent And Young Adult Oncology*, 9(5), 594–600. <https://doi.org/10.1089/jayao.2020.0001>

Fogel, C. I., Crandell, J. L., Neevel, A. M., Parker, S. D., Carry, M., White, B. L., Fasula, A. M.,

Herbst, J. H., & Gelaude, D. J. (2015). Efficacy of an adapted HIV and sexually transmitted infection prevention intervention for incarcerated women: a randomized controlled trial. *American Journal of Public Health*, 105(4), 802–809.

<https://doi.org/10.2105/AJPH.2014.302105>

Galárraga, O., Harries, J., Maughan-Brown, B., Cooper, D., Short, S. E., Lurie, M. N., &

Harrison, A. (2018). The Empower Nudge lottery to increase dual protection use: a proof-of-concept randomised pilot trial in South Africa. *Reproductive Health Matters*, 26(52), 1510701. <https://doi.org/10.1080/09688080.2018.1510701>

Gao, M. Y., & Wang, S. (2007). Participatory communication and HIV/AIDS prevention in a Chinese marginalized (MSM) population. *AIDS Care*, 19(6), 799–810.

<https://doi.org/10.1080/09540120601114832>

García, P. J., Holmes, K. K., Cárcamo, C. P., Garnett, G. P., Hughes, J. P., Campos, P. E., &

Whittington, W. L. (2012). Prevention of sexually transmitted infections in urban communities (Peru PREVEN): a multicomponent community-randomised controlled trial.

*The Lancet*, 379(9821), 1120–1128. [https://doi.org/10.1016/S0140-6736\(11\)61846-1](https://doi.org/10.1016/S0140-6736(11)61846-1)

- Glasman, L. R., Skinner, D., Bogart, L. M., Kalichman, S. C., McAuliffe, T., Sitzler, C. A., Toefy, Y., & Weinhardt, L. S. (2015). Do assessments of hiv risk behaviors change behaviors and prevention intervention efficacy? An experimental examination of the influence of type of assessment and risk perceptions. *Annals of Behavioral Medicine, 49*(3), 358–370. <https://doi.org/10.1007/s12160-014-9659-y>
- Go, V. F., Frangakis, C., Minh, N. Le, Latkin, C., Ha, T. V., Mo, T. T., Sripaipan, T., Davis, W. W., Zelaya, C., Vu, P. T., Celentano, D. D., & Quan, V. M. (2015). Efficacy of a multi-level intervention to reduce injecting and sexual risk behaviors among HIV-infected people who inject drugs in Vietnam: a four-arm randomized controlled trial. *PloS One, 10*(5), e0125909. <https://doi.org/10.1371/journal.pone.0125909>
- Goggin, K., Gerkovich, M. M., Williams, K. B., Banderas, J. W., Catley, D., Berkley-Patton, J., Wagner, G. J., Stanford, J., Neville, S., Kumar, V. K., Bamberger, D. M., & Clough, L. A. (2013). A randomized controlled trial examining the efficacy of motivational counseling with observed therapy for antiretroviral therapy adherence. *AIDS and Behavior, 17*(6), 1992–2001. <https://doi.org/10.1007/s10461-013-0467-3>
- Grimley, D. M., & Hook, E. W. (2009). A 15-minute interactive, computerized condom use intervention with biological endpoints. *Sexually Transmitted Diseases, 36*(2), 73–78. <https://doi.org/10.1097/OLQ.0b013e3181818eea81>
- Gryczynski, J., Mitchell, S. G., Schwartz, R. P., Dusek, K., O’Grady, K. E., Cowell, A. J., Barbosa, C., Barnosky, A., & DiClemente, C. C. (2021). Computer- vs. nurse practitioner-delivered brief intervention for adolescent marijuana, alcohol, and sex risk behaviors in school-based health centers. *Drug and Alcohol Dependence, 218*, 108423. <https://doi.org/10.1016/j.drugalcdep.2020.108423>

- Guo, Y., Li, Y., Yu, C., Xu, H., Hong, Y. A., Wang, X., Zhang, N., Zeng, Y., Monroe-Wise, A., Li, L., Liu, C., Cai, W., & Lin, A. (2022). Long-term effects of a social media-based intervention (Run4Love) on depressive symptoms of people living with HIV: 3-year follow-up of a randomized controlled trial. *Journal of Medical Internet Research*, *24*(6), e36809. <https://doi.org/10.2196/36809>
- Gwadz, M. V., Leonard, N. R., Cleland, C. M., Riedel, M., Banfield, A., Mildvan, D., & ACT2 Project Collaborative Research Team. (2011). The effect of peer-driven intervention on rates of screening for AIDS clinical trials among African Americans and Hispanics. *American Journal of Public Health*, *101*(6), 1096–1102. <https://doi.org/10.2105/AJPH.2010.196048>
- Hadley, W., Brown, L. K., Barker, D., Warren, J., Weddington, P., Fortune, T., & Juzang, I. (2016). Work it out together: preliminary efficacy of a parent and adolescent DVD and workbook intervention on adolescent sexual and substance use attitudes and parenting behaviors. *AIDS and Behavior*, *20*(9), 1961–1972. <https://doi.org/10.1007/s10461-016-1418-6>
- Hallfors, D., Cho, H., Rusakaniko, S., Iritani, B., Mapfumo, J., & Halpern, C. (2011). Supporting adolescent orphan girls to stay in school as HIV risk prevention: evidence from a randomized controlled trial in Zimbabwe. *American Journal of Public Health*, *101*(6), 1082–1088. <https://doi.org/10.2105/AJPH.2010.300042>
- Hanson, T., Alessi, S. M., & Petry, N. M. (2008). Contingency management reduces drug-related human immunodeficiency virus risk behaviors in cocaine-abusing methadone patients. *Addiction (Abingdon, England)*, *103*(7), 1187–1197. <https://doi.org/10.1111/j.1360-0443.2008.02216.x>

- Harvey, S. M., Henderson, J. T., Thorburn, S., Beckman, L. J., Casillas, A., Mendez, L., & Cervantes, R. (2004). A randomized study of a pregnancy and disease prevention intervention for Hispanic couples. *Perspectives on Sexual and Reproductive Health*, 36(4), 162–169. <https://doi.org/10.1363/psrh.36.162.04>
- Hershberger, S. L., Wood, M. M., & Fisher, D. G. (2003). A cognitive-behavioral intervention to reduce HIV risk behaviors in crack and injection drug users. *AIDS and Behavior*, 7(3), 229–243. <https://doi.org/10.1023/a:1025487501743>
- Hickey, M. D., Ouma, G. B., Mattah, B., Pederson, B., DesLauriers, N. R., Mohamed, P., Obanda, J., Odhiambo, A., Njoroge, B., Otieno, L., Zoughbie, D. E., Ding, E. L., Fiorella, K. J., Bukusi, E. A., Cohen, C. R., Geng, E. H., & Salmen, C. R. (2021). The Kanyakla study: Randomized controlled trial of a microclinic social network intervention for promoting engagement and retention in HIV care in rural western Kenya. *PloS One*, 16(9), e0255945. <https://doi.org/10.1371/journal.pone.0255945>
- Hoffman, S., Exner, T. M., Leu, C.-S., Ehrhardt, A. A., & Stein, Z. (2003). Female-condom use in a gender-specific family planning clinic trial. *American Journal of Public Health*, 93(11), 1897–1903. <https://doi.org/10.2105/ajph.93.11.1897>
- Hoke, T. H., Feldblum, P. J., Damme, K. Van, Nasution, M. D., Grey, T. W., Wong, E. L., Ralimamonjy, L., Raharimalala, L., & Rasamindrakotroka, A. (2007). Randomised controlled trial of alternative male and female condom promotion strategies targeting sex workers in Madagascar. *Sexually Transmitted Infections*, 83(6), 448–453. <https://doi.org/10.1136/sti.2006.024612>

- Holzemer, W. L., Bakken, S., Portillo, C. J., Grimes, R., Welch, J., Wantland, D., & Mullan, J. T. (2006). Testing a nurse-tailored HIV medication adherence intervention. *Nursing Research, 55*(3), 189–197. <https://doi.org/10.1097/00006199-200605000-00005>
- Horvath, K. J., Lammert, S., MacLehose, R. F., Danh, T., Baker, J. V, & Carrico, A. W. (2019). A pilot study of a mobile app to support hiv antiretroviral therapy adherence among men who have sex with men who use stimulants. *AIDS and Behavior, 23*(11), 3184–3198. <https://doi.org/10.1007/s10461-019-02597-3>
- Ingersoll, K. S., Farrell-Carnahan, L., Cohen-Filipic, J., Heckman, C. J., Ceperich, S. D., Hetteema, J., & Marzani-Nissen, G. (2011). A pilot randomized clinical trial of two medication adherence and drug use interventions for HIV+ crack cocaine users. *Drug and Alcohol Dependence, 116*(1–3), 177–187. <https://doi.org/10.1016/j.drugalcdep.2010.12.016>
- Jemmott, L. S., Jemmott, J. B., Icard, L. D., & Hsu, J. (2020). Effects of church-based parent–child abstinence-only interventions on adolescents’ sexual behaviors. *Journal of Adolescent Health, 66*(1), 107–114. <https://doi.org/10.1016/j.jadohealth.2019.07.021>
- Jemmott, L. S., Jemmott, J. B., & O’Leary, A. (2007). Effects on sexual risk behavior and STD rate of brief HIV/STD prevention interventions for African American women in primary care settings. *American Journal of Public Health, 97*(6), 1034–1040. <https://doi.org/10.2105/AJPH.2003.020271>
- Johnson, M. O., Dilworth, S. E., Taylor, J. M., & Neilands, T. B. (2011). Improving coping skills for self-management of treatment side effects can reduce antiretroviral medication nonadherence among people living with HIV. *Annals of Behavioral Medicine, 41*(1), 83–91. <https://doi.org/10.1007/s12160-010-9230-4>

- Jones, D. L., Ishii, M., LaPerriere, A., Stanley, H., Antoni, M., Ironson, G., Schneiderman, N., Van Splunteren, F., Cassells, A., Alexander, K., Gousse, Y. P., Vaughn, A., Brondolo, E., Tobin, J. N., & Weiss, S. M. (2003). Influencing medication adherence among women with AIDS. *AIDS Care, 15*(4), 463–474. <https://doi.org/10.1080/0954012031000134700>
- Jones, H. E., Martin, C. E., Andringa, K. R., Ellerson, R. M., Johnson, E., Hairston, E., & O'Grady, K. E. (2021). Sex and female empowerment (SAFE): A randomized trial comparing sexual health interventions for women in treatment for opioid use disorder. *Drug and Alcohol Dependence, 221*, 108634. <https://doi.org/10.1016/j.drugalcdep.2021.108634>
- Kalichman, S. C., Simbayi, L. C., Cain, D., Carey, K. B., Carey, M. P., Eaton, L., Harel, O., Mehlomakhulu, V., & Mwaba, K. (2014). Randomized community-level HIV prevention intervention trial for men who drink in South African alcohol-serving venues. *European Journal of Public Health, 24*(5), 833–839. <https://doi.org/10.1093/eurpub/ckt172>
- Kalichman, S. C., Simbayi, L. C., Cloete, A., Clayford, M., Arnolds, W., Mxoli, M., Smith, G., Cherry, C., Shefer, T., Crawford, M., & Kalichman, M. O. (2009). Integrated gender-based violence and HIV Risk reduction intervention for South African men: results of a quasi-experimental field trial. *Prevention Science, 10*(3), 260–269. <https://doi.org/10.1007/s11121-009-0129-x>
- Kane, J. C., Sharma, A., Murray, L. K., Chander, G., Kanguya, T., Skavenski, S., Chitambi, C., Lasater, M. E., Paul, R., Cropsey, K., Inoue, S., Bosomprah, S., Danielson, C. K., Chipungu, J., Simenda, F., & Vinikoor, M. J. (2022). Efficacy of the Common Elements Treatment Approach (CETA) for unhealthy alcohol use among adults with HIV in Zambia: results from a pilot randomized controlled trial. *AIDS and Behavior, 26*(2), 523–536. <https://doi.org/10.1007/s10461-021-03408-4>

- Kelly, J. A., Amirkhanian, Y. A., Kabakchieva, E., Vassileva, S., Vassilev, B., McAuliffe, T. L., DiFranceisco, W. J., Antonova, R., Petrova, E., Khoursine, R. A., & Dimitrov, B. (2006). Prevention of HIV and sexually transmitted diseases in high risk social networks of young Roma (Gypsy) men in Bulgaria: randomised controlled trial. *BMJ (Clinical Research Ed.)*, 333(7578), 1098. <https://doi.org/10.1136/bmj.38992.478299.55>
- Kelly, J. A., Murphy, D. A., Sikkema, K. J., McAuliffe, T. L., Roffman, R. A., Solomon, L. J., Winett, R. A., & Kalichman, S. C. (1997). Randomised, controlled, community-level HIV-prevention intervention for sexual-risk behaviour among homosexual men in US cities. Community HIV Prevention Research Collaborative. *Lancet (London, England)*, 350(9090), 1500–1505. [https://doi.org/10.1016/s0140-6736\(97\)07439-4](https://doi.org/10.1016/s0140-6736(97)07439-4)
- Kerrigan, D., Moreno, L., Rosario, S., Gomez, B., Jerez, H., Barrington, C., Weiss, E., & Sweat, M. (2006). Environmental-structural interventions to reduce HIV/STI risk among female sex workers in the Dominican Republic. *American Journal of Public Health*, 96(1), 120–125. <https://doi.org/10.2105/AJPH.2004.042200>
- Kershaw, T. S., Magriples, U., Westdahl, C., Rising, S. S., & Ickovics, J. (2009). Pregnancy as a window of opportunity for HIV prevention: effects of an HIV intervention delivered within prenatal care. *American Journal of Public Health*, 99(11), 2079–2086. <https://doi.org/10.2105/AJPH.2008.154476>
- Knudsen, H. K., Staton-Tindall, M., Oser, C. B., Havens, J. R., & Leukefeld, C. G. (2014). Reducing risky relationships: a multisite randomized trial of a prison-based intervention for reducing HIV sexual risk behaviors among women with a history of drug use. *AIDS Care*, 26(9), 1071–1079. <https://doi.org/10.1080/09540121.2013.878779>

- Koblin, B., Chesney, M., Coates, T., & EXPLORE Study Team. (n.d.). Effects of a behavioural intervention to reduce acquisition of HIV infection among men who have sex with men: the EXPLORE randomised controlled study. *Lancet (London, England)*, *364*(9428), 41–50. [https://doi.org/10.1016/S0140-6736\(04\)16588-4](https://doi.org/10.1016/S0140-6736(04)16588-4)
- Koniak-Griffin, D., Lesser, J., Henneman, T., Rong Huang, Xin Huang, Tello, J., Kappos, B., González-Figueroa, E., & Cumberland, W. G. (2008). HIV prevention for Latino adolescent mothers and their partners. *Western Journal of Nursing Research*, *30*(6), 724–742. <https://doi.org/10.1177/0193945907310490>
- Konkle-Parker, D. J., Erlen, J. A., Dubbert, P. M., & May, W. (2012). Pilot testing of an HIV medication adherence intervention in a public clinic in the Deep South. *Journal of the American Academy of Nurse Practitioners*, *24*(8), 488–498. <https://doi.org/10.1111/j.1745-7599.2012.00712.x>
- Landon, B. E., Wilson, I. B., McInnes, K., Landrum, M. B., Hirschhorn, L., Marsden, P. V., Gustafson, D., & Cleary, P. D. (2004). Effects of a quality improvement collaborative on the outcome of care of patients with HIV infection: the EQHIV study. *Annals of Internal Medicine*, *140*(11), 887–896. <https://doi.org/10.7326/0003-4819-140-11-200406010-00010>
- Lapinski, M. K., Randall, L. M., Peterson, M., Peterson, A., & Klein, K. A. (2009). Prevention options for positives: the effects of a health communication intervention for men who have sex with men living with HIV/AIDS. *Health Communication*, *24*(6), 562–571. <https://doi.org/10.1080/10410230903104947>
- Larsson, M., Eurenus, K., Westerling, R., & Tydén, T. (2006). Evaluation of a sexual education intervention among Swedish high school students. *Scandinavian Journal of Public Health*, *34*(2), 124–131. <https://doi.org/10.1080/14034940510032266>



- Latkin, C. A., Donnell, D., Metzger, D., Sherman, S., Aramrattna, A., Davis-Vogel, A., Quan, V. M., Gandham, S., Vongchak, T., Perdue, T., & Celentano, D. D. (2009). The efficacy of a network intervention to reduce HIV risk behaviors among drug users and risk partners in Chiang Mai, Thailand and Philadelphia, USA. *Social Science & Medicine* (1982), 68(4), 740–748. <https://doi.org/10.1016/j.socscimed.2008.11.019>
- Lau, J. T. F., Lau, M., Cheung, A., & Tsui, H. Y. (2008). A randomized controlled study to evaluate the efficacy of an Internet-based intervention in reducing HIV risk behaviors among men who have sex with men in Hong Kong. *AIDS Care*, 20(7), 820–828. <https://doi.org/10.1080/09540120701694048>
- Lau, J. T. F., Tsui, H. Y., Cheng, S., & Pang, M. (2010). A randomized controlled trial to evaluate the relative efficacy of adding voluntary counseling and testing (VCT) to information dissemination in reducing HIV-related risk behaviors among Hong Kong male cross-border truck drivers. *AIDS Care*, 22(1), 17–28. <https://doi.org/10.1080/09540120903012619>
- Lauby, J. L., Smith, P. J., Stark, M., Person, B., & Adams, J. (2000). A community-level HIV prevention intervention for inner-city women: results of the women and infants demonstration projects. *American Journal of Public Health*, 90(2), 216–222. <https://doi.org/10.2105/ajph.90.2.216>
- Letourneau, E. J., McCart, M. R., Sheidow, A. J., & Mauro, P. M. (2017). First evaluation of a contingency management intervention addressing adolescent substance use and sexual risk behaviors: risk reduction therapy for adolescents. *Journal of Substance Abuse Treatment*, 72, 56–65. <https://doi.org/10.1016/j.jsat.2016.08.019>

- Lin, D., Li, X., Stanton, B., Fang, X., Lin, X., Xu, X., Ma, L., & Xia, C. (2010). Theory-based HIV-related sexual risk reduction prevention for chinese female rural-to-urban migrants. *AIDS Education and Prevention*, *22*(4), 344–355.  
<https://doi.org/10.1521/aeap.2010.22.4.344>
- Lloyd-Richardson, E. E., Stanton, C. A., Papandonatos, G. D., Shadel, W. G., Stein, M., Tashima, K., Flanigan, T., Morrow, K., Neighbors, C., & Niaura, R. (2009). Motivation and patch treatment for HIV+ smokers: a randomized controlled trial. *Addiction (Abingdon, England)*, *104*(11), 1891–1900. <https://doi.org/10.1111/j.1360-0443.2009.02623.x>
- Lugada, E., Levin, J., Abang, B., Mermin, J., Mugalanzi, E., Namara, G., Gupta, S., Grosskurth, H., Jaffar, S., Coutinho, A., & Bunnell, R. (2010). Comparison of home and clinic-based HIV testing among household members of persons taking antiretroviral therapy in Uganda: results from a randomized trial. *Journal of Acquired Immune Deficiency Syndromes (1999)*, *55*(2), 245–252. <https://doi.org/10.1097/QAI.0b013e3181e9e069>
- Lutalo, T., Kigozi, G., Kimera, E., Serwadda, D., Wawer, M. J., Zabin, L. S., & Gray, R. H. (2010). A randomized community trial of enhanced family planning outreach in Rakai, Uganda. *Studies in Family Planning*, *41*(1), 55–60. <https://doi.org/10.1111/j.1728-4465.2010.00224.x>
- Madhombiro, M., Kidd, M., Dube, B., Dube, M., Mutsvuke, W., Muronzie, T., Zhou, D. T., Derveeuw, S., Chibanda, D., Chingono, A., Rusakaniko, S., Hutson, A., Morse, G. D., Abas, M. A., & Seedat, S. (2020). Effectiveness of a psychological intervention delivered by general nurses for alcohol use disorders in people living with HIV in Zimbabwe: a cluster randomized controlled trial. *Journal of the International AIDS Society*, *23*(12).  
<https://doi.org/10.1002/jia2.25641>

- Marsch, L. A., Guarino, H., Grabinski, M. J., Syckes, C., Dillingham, E. T., Xie, H., & Crosier, B. S. (2015). Comparative effectiveness of web-based vs. educator-delivered hiv prevention for adolescent substance users: a randomized, controlled trial. *Journal of Substance Abuse Treatment, 59*, 30–37. <https://doi.org/10.1016/j.jsat.2015.07.003>
- Martin, S. S., O'Connell, D. J., Inciardi, J. A., Surratt, H. L., & Beard, R. A. (2003). HIV/AIDS among probationers: an assessment of risk and results from a brief intervention. *Journal of Psychoactive Drugs, 35*(4), 435–443. <https://doi.org/10.1080/02791072.2003.10400490>
- Mausbach, B. T., Semple, S. J., Strathdee, S. A., Zians, J., & Patterson, T. L. (2007). Efficacy of a behavioral intervention for increasing safer sex behaviors in HIV-negative, heterosexual methamphetamine users: results from the Fast-Lane Study. *Annals of Behavioral Medicine, 34*(3), 263–274. <https://doi.org/10.1007/BF02874551>
- McCusker, J., Bigelow, C., Frost, R., Garfield, F., Hindin, R., Vickers-Lahti, M., & Lewis, B. (1997). The effects of planned duration of residential drug abuse treatment on recovery and HIV risk behavior. *American Journal of Public Health, 87*(10), 1637–1644. <https://doi.org/10.2105/ajph.87.10.1637>
- McMahon, R. C., Malow, R. M., Jennings, T. E., & Gomez, C. J. (2001). Effects of a cognitive-behavioral HIV prevention intervention among HIV negative male substance abusers in VA residential treatment. *AIDS Education and Prevention, 13*(1), 91–107. <https://doi.org/10.1521/aeap.13.1.91.18921>
- Meade, C. S., Drabkin, A. S., Hansen, N. B., Wilson, P. A., Kochman, A., & Sikkema, K. J. (2010). Reductions in alcohol and cocaine use following a group coping intervention for HIV-positive adults with childhood sexual abuse histories. *Addiction (Abingdon, England), 105*(11), 1942–1951. <https://doi.org/10.1111/j.1360-0443.2010.03075.x>

- Mendez-Ruiz, M. D., Villegas-Pantoja, M. A., Alarcón-Luna, N. S., Villegas, N., Cianelli, R., & Peragallo-Montano, N. (2020). Prevention of alcohol consumption and transmission of human immunodeficiency virus: randomized clinical trial. *Revista Latino-Americana de Enfermagem*, 28. <https://doi.org/10.1590/1518-8345.3393.3262>
- Miller, M. K., Catley, D., Adams, A., Staggs, V. S., Dowd, M. D., Stancil, S. L., Miller, E., Satterwhite, C. L., Bauermeister, J., & Goggin, K. (2021). Brief motivational intervention to improve adolescent sexual health service uptake: A pilot randomized controlled trial in the emergency department. *The Journal of Pediatrics*, 237, 250-257.e2. <https://doi.org/10.1016/j.jpeds.2021.06.007>
- Mimiaga, M. J., Pantalone, D. W., Biello, K. B., Hughto, J. M. W., Frank, J., O’Cleirigh, C., Reisner, S. L., Restar, A., Mayer, K. H., & Safren, S. A. (2019). An initial randomized controlled trial of behavioral activation for treatment of concurrent crystal methamphetamine dependence and sexual risk for HIV acquisition among men who have sex with men. *AIDS Care*, 31(9), 1083–1095. <https://doi.org/10.1080/09540121.2019.1595518>
- Monti, P. M., Mastroleo, N. R., Barnett, N. P., Colby, S. M., Kahler, C. W., & Operario, D. (2016). Brief motivational intervention to reduce alcohol and HIV/sexual risk behavior in emergency department patients: A randomized controlled trial. *Journal of Consulting and Clinical Psychology*, 84(7), 580–591. <https://doi.org/10.1037/ccp0000097>
- Murphy, D. A., Chen, X., Naar-King, S., Parsons, J. T., & Adolescent Trials Network. (2012). Alcohol and marijuana use outcomes in the Healthy Choices motivational interviewing intervention for HIV-positive youth. *AIDS Patient Care and STDs*, 26(2), 95–100. <https://doi.org/10.1089/apc.2011.0157>

Ng, M. Y., Tolou-Shams, M., Galbraith, K., & Brown, L. K. (2020). Parent psychological distress: a moderator of behavioral health intervention outcomes among justice-involved adolescents. *Journal of Research on Adolescence*, 30(1), 53–62.

<https://doi.org/10.1111/jora.12512>

Ng, M. Y., Tolou-Shams, M., Galbraith, K., & Brown, L. K. (2020). Parent psychological distress: a moderator of behavioral health intervention outcomes among justice-involved adolescents. *Journal of Research on Adolescence*, 30(1), 53–62.

<https://doi.org/10.1111/jora.12512>

Njuguna, N., Ngure, K., Mugo, N., Sambu, C., Siano, C., Gakuo, S., Irungu, E., Baeten, J., & Heffron, R. (2016). The effect of human immunodeficiency virus prevention and reproductive health text messages on human immunodeficiency virus testing among young women in rural Kenya: A pilot study. *Sexually Transmitted Diseases*, 43(6), 353–359.

<https://doi.org/10.1097/OLQ.0000000000000450>

Nöstlinger, C., Platteau, T., Bogner, J., Buyze, J., Dec-Pietrowska, J., Dias, S., Newbury-Helps, J., Kocsis, A., Mueller, M., Rojas, D., Stanekova, D., van Lankveld, J., Colebunders, R., & Eurosupport Study Group. (2016). Implementation and operational research: Computer-assisted intervention for safer sex in HIV-positive men having sex with men: findings of a European randomized multi-center trial. *Journal of Acquired Immune Deficiency Syndromes (1999)*, 71(3), e63-72. <https://doi.org/10.1097/QAI.0000000000000882>

Parcesepe, A. M., L'Engle, K. L., Martin, S. L., Green, S., Sinkele, W., Suchindran, C., Speizer, I. S., Mwarogo, P., & Kingola, N. (2016). The impact of an alcohol harm reduction intervention on interpersonal violence and engagement in sex work among female sex

- workers in Mombasa, Kenya: Results from a randomized controlled trial. *Drug and Alcohol Dependence*, *161*, 21–28. <https://doi.org/10.1016/j.drugalcdep.2015.12.037>
- Parsons, J. T., Golub, S. A., Rosof, E., & Holder, C. (2007). Motivational interviewing and cognitive-behavioral intervention to improve HIV medication adherence among hazardous drinkers. *JAIDS Journal of Acquired Immune Deficiency Syndromes*, *46*(4), 443–450. <https://doi.org/10.1097/QAI.0b013e318158a461>
- Parsons, J. T., Lelutiu-Weinberger, C., Botsko, M., & Golub, S. A. (2014). A randomized controlled trial utilizing motivational interviewing to reduce HIV risk and drug use in young gay and bisexual men. *Journal of Consulting and Clinical Psychology*, *82*(1), 9–18. <https://doi.org/10.1037/a0035311>
- Pearson, C. R., Kaysen, D., Huh, D., & Bedard-Gilligan, M. (2019). Randomized control trial of culturally adapted cognitive processing therapy for PTSD substance misuse and HIV sexual risk behavior for native American women. *AIDS and Behavior*, *23*(3), 695–706. <https://doi.org/10.1007/s10461-018-02382-8>
- Peltzer, K., Simbayi, L., Banyini, M., & Kekana, Q. (2012). HIV risk reduction intervention among medically circumcised young men in South Africa: a randomized controlled trial. *International Journal of Behavioral Medicine*, *19*(3), 336–341. <https://doi.org/10.1007/s12529-011-9171-8>
- Peragallo, N., Gonzalez-Guarda, R. M., McCabe, B. E., & Cianelli, R. (2012). The efficacy of an HIV risk reduction intervention for hispanic women. *AIDS and Behavior*, *16*(5), 1316–1326. <https://doi.org/10.1007/s10461-011-0052-6>
- Pettifor, A., Corneli, A., Kamanga, G., McKenna, K., Rosenberg, N. E., Yu, X., Ou, S.-S., Massa, C., Wiyo, P., Lynn, D., Tharaldson, J., Golin, C., Hoffman, I., & HPTN 062 Study

Protocol Team. (2015). HPTN 062: A pilot randomized controlled trial exploring the effect of a motivational-interviewing intervention on sexual behavior among individuals with acute HIV infection in Lilongwe, Malawi. *PloS One*, *10*(5), e0124452.

<https://doi.org/10.1371/journal.pone.0124452>

Pop-Eleches, C., Thirumurthy, H., Habyarimana, J. P., Zivin, J. G., Goldstein, M. P., de Walque, D., MacKeen, L., Haberer, J., Kimaiyo, S., Sidle, J., Ngare, D., & Bangsberg, D. R. (2011). Mobile phone technologies improve adherence to antiretroviral treatment in a resource-limited setting: a randomized controlled trial of text message reminders. *AIDS*, *25*(6), 825–834. <https://doi.org/10.1097/QAD.0b013e32834380c1>

Prado, G., Pantin, H., Briones, E., Schwartz, S. J., Feaster, D., Huang, S., Sullivan, S., Tapia, M. I., Sabillon, E., Lopez, B., & Szapocznik, J. (2007). A randomized controlled trial of a parent-centered intervention in preventing substance use and HIV risk behaviors in Hispanic adolescents. *Journal of Consulting and Clinical Psychology*, *75*(6), 914–926. <https://doi.org/10.1037/0022-006X.75.6.914>

Purcell, D. W., Latka, M. H., Metsch, L. R., Latkin, C. A., Gómez, C. A., Mizuno, Y., Arnsten, J. H., Wilkinson, J. D., Knight, K. R., Knowlton, A. R., Santibanez, S., Tobin, K. E., Rose, C. D., Valverde, E. E., Gourevitch, M. N., Eldred, L., Borkowf, C. B., & INSPIRE Study Team. (2007). Results from a randomized controlled trial of a peer-mentoring intervention to reduce HIV transmission and increase access to care and adherence to HIV medications among HIV-seropositive injection drug users. *Journal of Acquired Immune Deficiency Syndromes (1999)*, *46 Suppl 2*, S35-47. <https://doi.org/10.1097/QAI.0b013e31815767c4>

Reback, C. J., Peck, J. A., Dierst-Davies, R., Nuno, M., Kamien, J. B., & Amass, L. (2010). Contingency management among homeless, out-of-treatment men who have sex with men.

*Journal of Substance Abuse Treatment*, 39(3), 255–263.

<https://doi.org/10.1016/j.jsat.2010.06.007>

Rhodes, S. D., Alonzo, J., Mann, L., Song, E. Y., Tanner, A. E., Arellano, J. E., Rodriguez-Celedon, R., Garcia, M., Freeman, A., Reboussin, B. A., & Painter, T. M. (2017). Small-group randomized controlled trial to increase condom use and hiv testing among Hispanic/Latino gay, bisexual, and other men who have sex with men. *American Journal of Public Health*, 107(6), 969–976. <https://doi.org/10.2105/AJPH.2017.303814>

Richardson, J. L., Milam, J., Mccutchan, A., Stoyanoff, S., Bolan, R., Weiss, J., Kemper, C., Larsen, R. A., Hollander, H., Weismuller, P., Chou, C.-P., & Marks, G. (2004). Effect of brief safer-sex counseling by medical providers to HIV-1 seropositive patients: a multi-clinic assessment. *AIDS*, 18, 1179–1186.

<https://doi.org/10.1097/01.aids.0000125965.01259.5f>

Rinehart, D. J., Leslie, S., Durfee, M. J., Stowell, M., Cox-Martin, M., Thomas-Gale, T., Shlay, J. C., & Havranek, E. P. (2020). Acceptability and efficacy of a sexual health texting intervention designed to support adolescent females. *Academic Pediatrics*, 20(4), 475–484. <https://doi.org/10.1016/j.acap.2019.09.004>

Robles, R. R., Reyes, J. C., Colón, H. M., Sahai, H., Marrero, C. A., Matos, T. D., Calderón, J. M., & Shepard, E. W. (2004). Effects of combined counseling and case management to reduce HIV risk behaviors among Hispanic drug injectors in Puerto Rico: A randomized controlled study. *Journal of Substance Abuse Treatment*, 27(2), 145–152.

<https://doi.org/10.1016/j.jsat.2004.06.004>

Rongkavilit, C., Naar-King, S., Wang, B., Panthong, A., Bunupuradah, T., Parsons, J. T., Phonphithak, S., Koken, J. A., Saengcharnchai, P., & Phanuphak, P. (2013). Motivational



interviewing targeting risk behaviors for youth living with HIV in Thailand. *AIDS and Behavior*, 17(6), 2063–2074. <https://doi.org/10.1007/s10461-013-0407-2>

Rotheram-Borus, M. J., Lee, M. B., Murphy, D. A., Futterman, D., Duan, N., Birnbaum, J. M., Lightfoot, M., & Teens Linked to Care Consortium. (2001). Efficacy of a preventive intervention for youths living with HIV. *American Journal of Public Health*, 91(3), 400–405. <https://doi.org/10.2105/ajph.91.3.400>

Rotheram-Borus, M. J., Li, L., Liang, L.-J., Wen, Y., Wu, Z., & NIMH Collaborative HIV/STD Prevention Trial Group. (2011). Attitudinal, behavioral, and biological outcomes of a community popular opinion leader intervention in China. *AIDS Education and Prevention*, 23(5), 448–456. <https://doi.org/10.1521/aeap.2011.23.5.448>

Rotheram-Borus, M. J., Murphy, D. A., Fernandez, M. I., & Srinivasan, S. (1998). A brief HIV intervention for adolescents and young adults. *American Journal of Orthopsychiatry*, 68(4), 553–564. <https://doi.org/10.1037/h0080364>

Roux, P., Le Gall, J., Debrus, M., Protopopescu, C., Ndiaye, K., Demoulin, B., Lions, C., Haas, A., Mora, M., Spire, B., Suzan-Monti, M., & Carrieri, M. P. (2016). Innovative community-based educational face-to-face intervention to reduce HIV, hepatitis C virus and other blood-borne infectious risks in difficult-to-reach people who inject drugs: results from the ANRS–AERLI intervention study. *Addiction*, 111(1), 94–106. <https://doi.org/10.1111/add.13089>

Rowe, C. L., Alberga, L., Dakof, G. A., Henderson, C. E., Ungaro, R., & Liddle, H. A. (2016). Family-based HIV and sexually transmitted infection risk reduction for drug-involved young offenders: 42-month outcomes. *Family Process*, 55(2), 305–320. <https://doi.org/10.1111/famp.12206>

- Sakthivel, R. (2022). Impact of adherence counselling with hatha yoga on HIV-infected adolescents: a randomized controlled trial. *HIV & AIDS Review*, 21(3), 215–221.  
<https://doi.org/10.5114/hivar.2022.117284>
- Sales, J. M., Lang, D. L., Hardin, J. W., DiClemente, R. J., & Wingood, G. M. (2010). Efficacy of an HIV prevention program among African American female adolescents reporting high depressive symptomatology. *Journal of Women's Health*, 19(2), 219–227.  
<https://doi.org/10.1089/jwh.2008.1326>
- Samet, J. H., Blokhina, E., Cheng, D. M., Walley, A. Y., Lioznov, D., Gnatienco, N., Quinn, E. K., Bridden, C., Chaisson, C. E., Toussova, O., Gifford, A. L., Raj, A., & Krupitsky, E. (2019). A strengths-based case management intervention to link HIV-positive people who inject drugs in Russia to HIV care. *AIDS (London, England)*, 33(9), 1467–1476.  
<https://doi.org/10.1097/QAD.0000000000002230>
- Samet, J. H., Krupitsky, E. M., Cheng, D. M., Raj, A., Egorova, V. Y., Levenson, S., Meli, S., Bridden, C., Verbitskaya, E. V., Kamb, M. L., & Zvartau, E. E. (2008). Mitigating risky sexual behaviors among Russian narcology hospital patients: the PREVENT (Partnership to Reduce the Epidemic Via Engagement in Narcology Treatment) randomized controlled trial. *Addiction (Abingdon, England)*, 103(9), 1474–1483. <https://doi.org/10.1111/j.1360-0443.2008.02251.x>
- Samet, J. H., Raj, A., Cheng, D. M., Blokhina, E., Bridden, C., Chaisson, C. E., Walley, A. Y., Palfai, T. P., Quinn, E. K., Zvartau, E., Lioznov, D., & Krupitsky, E. (2015). HERMITAGE--a randomized controlled trial to reduce sexually transmitted infections and HIV risk behaviors among HIV-infected Russian drinkers. *Addiction (Abingdon, England)*, 110(1), 80–90. <https://doi.org/10.1111/add.12716>

- Santos, G.-M., Coffin, P. O., Vittinghoff, E., DeMicco, E., Das, M., Matheson, T., Raiford, J. L., Carry, M., Colfax, G., Herbst, J. H., & Dilley, J. W. (2014). Substance use and drinking outcomes in Personalized Cognitive Counseling randomized trial for episodic substance-using men who have sex with men. *Drug and Alcohol Dependence, 138*, 234–239. <https://doi.org/10.1016/j.drugalcdep.2014.02.015>
- Sellers, D. E., McGraw, S. A., & McKinlay, J. B. (1994). Does the promotion and distribution of condoms increase teen sexual activity? Evidence from an HIV prevention program for Latino youth. *American Journal of Public Health, 84*(12), 1952–1959. <https://doi.org/10.2105/ajph.84.12.1952>
- Sorensen, J. L., Haug, N. A., Delucchi, K. L., Gruber, V., Kletter, E., Batki, S. L., Tulskey, J. P., Barnett, P., & Hall, S. (2007). Voucher reinforcement improves medication adherence in HIV-positive methadone patients: a randomized trial. *Drug and Alcohol Dependence, 88*(1), 54–63. <https://doi.org/10.1016/j.drugalcdep.2006.09.019>
- St Lawrence, J., Eldridge, G. D., Shelby, M. C., Little, C. E., Brasfield, T. L., & O'Bannon, R. E. (1997). HIV risk reduction for incarcerated women: a comparison of brief interventions based on two theoretical models. *Journal of Consulting and Clinical Psychology, 65*(3), 504–509. <https://doi.org/10.1037//0022-006x.65.3.504>
- St Lawrence, J. S., Jefferson, K. W., Alleyne, E., & Brasfield, T. L. (1995). Comparison of education versus behavioral skills training interventions in lowering sexual HIV-risk behavior of substance-dependent adolescents. *Journal of Consulting and Clinical Psychology, 63*(1), 154–157. <https://doi.org/10.1037//0022-006x.63.1.154>
- Stephenson, R., Sullivan, S. P., Mitchell, J. W., Johnson, B. A., & Sullivan, P. S. (2022). Efficacy of a telehealth delivered Couples' HIV Counseling and Testing (CHTC)

intervention to improve formation and adherence to safer sexual agreements among male couples in the us: results from a randomized control trial. *AIDS and Behavior*, 26(8), 2813–2824. <https://doi.org/10.1007/s10461-022-03619-3>

Stephenson, R., Vwalika, B., Greenberg, L., Ahmed, Y., Vwalika, C., Chomba, E., Kilembe, W., Tichacek, A., & Allen, S. (2011). A randomized controlled trial to promote long-term contraceptive use among HIV-serodiscordant and concordant positive couples in Zambia. *Journal Of Women's Health (2002)*, 20(4), 567–574. <https://doi.org/10.1089/jwh.2010.2113>

Stewart, K. E., Wright, P. B., Montgomery, B. E. E., Gullette, D., Pulley, L., Ounpraseuth, S., Thostenson, J., & Booth, B. (2017). Reducing risky sex among rural African American cocaine users: a controlled trial. *Journal of Health Care for the Poor and Underserved*, 28(1), 528–547. <https://doi.org/10.1353/hpu.2017.0038>

Surratt, H. L., & Inciardi, J. A. (2010). An effective HIV risk-reduction protocol for drug-using female sex workers. *Journal of Prevention & Intervention in The Community*, 38(2), 118–131. <https://doi.org/10.1080/10852351003640732>

Thato, R., Jenkins, R. A., & Dusitsin, N. (2008). Effects of the culturally-sensitive comprehensive sex education programme among Thai secondary school students. *Journal of Advanced Nursing*, 62(4), 457–469. <https://doi.org/10.1111/j.1365-2648.2008.04609.x>

Thomas, J. C., Reynolds, H. W., Alterescu, X., Bevc, C., & Tsegaye, A. (2016). Improving referrals and integrating family planning and HIV services through organizational network strengthening. *Health Policy and Planning*, 31(3), 302–308. <https://doi.org/10.1093/heapol/czv058>

Thurman, T. R., Kidman, R., Carton, T. W., & Chiroro, P. (2016). Psychological and behavioral interventions to reduce HIV risk: evidence from a randomized control trial among orphaned

and vulnerable adolescents in South Africa. *AIDS Care*, 28(sup1), 8–15.

<https://doi.org/10.1080/09540121.2016.1146213>

Tingey, L., Chambers, R., Littlepage, S., Lee, A., Slimp, A., Melgar, L., Cwik, M., Gaydos, C., Rompalo, A., & Rosenstock, S. (2021). “Empowering our people”: impact of a culturally adapted evidence-based intervention on sexually transmitted infection risks among native Americans with binge substance use. *Sexually Transmitted Diseases*, 48(9), 622–628.

<https://doi.org/10.1097/OLQ.0000000000001418>

Tobin, K., Davey-Rothwell, M. A., Nonyane, B. A. S., Knowlton, A., Wissow, L., & Latkin, C. A. (2017). RCT of an integrated CBT-HIV intervention on depressive symptoms and HIV risk. *PloS One*, 12(12), e0187180. <https://doi.org/10.1371/journal.pone.0187180>

Tucker, J. S., D’Amico, E. J., Ewing, B. A., Miles, J. N. V., & Pedersen, E. R. (2017). A group-based motivational interviewing brief intervention to reduce substance use and sexual risk behavior among homeless young adults. *Journal of Substance Abuse Treatment*, 76, 20–27. <https://doi.org/10.1016/j.jsat.2017.02.008>

Wandera, B., Tumwesigye, N. M., Nankabirwa, J. I., Mafigiri, D. K., Parkes-Ratanshi, R. M., Kapiga, S., Hahn, J., & Sethi, A. K. (2017). Efficacy of a single, brief alcohol reduction intervention among men and women living with HIV/AIDS and using alcohol in Kampala, Uganda: A randomized trial. *Journal of the International Association of Providers of AIDS Care (JIAPAC)*, 16(3), 276–285. <https://doi.org/10.1177/2325957416649669>

Wang, H., Zhou, J., Huang, L., Li, X., Fennie, K. P., & Williams, A. B. (2010). Effects of nurse-delivered home visits combined with telephone calls on medication adherence and quality of life in HIV-infected heroin users in Hunan of China. *Journal of Clinical Nursing*, 19(3–4), 380–388. <https://doi.org/10.1111/j.1365-2702.2009.03048.x>

- Wawer, M. J., Makumbi, F., Kigozi, G., Serwadda, D., Watya, S., Nalugoda, F., Buwembo, D., Ssempijja, V., Kiwanuka, N., Moulton, L. H., Sewankambo, N. K., Reynolds, S. J., Quinn, T. C., Opendi, P., Iga, B., Ridzon, R., Laeyendecker, O., & Gray, R. H. (2009). Circumcision in HIV-infected men and its effect on HIV transmission to female partners in Rakai, Uganda: a randomised controlled trial. *Lancet (London, England)*, *374*(9685), 229–237. [https://doi.org/10.1016/S0140-6736\(09\)60998-3](https://doi.org/10.1016/S0140-6736(09)60998-3)
- Wechsberg, W. M., Luseno, W. K., Lam, W. K. K., Parry, C. D. H., & Morojele, N. K. (2006). Substance use, sexual risk, and violence: HIV prevention intervention with sex workers in Pretoria. *AIDS and Behavior*, *10*(2), 131–137. <https://doi.org/10.1007/s10461-005-9036-8>
- Wernette, G. T., Plegue, M., Kahler, C. W., Sen, A., & Zlotnick, C. (2018). A pilot randomized controlled trial of a computer-delivered brief intervention for substance use and risky sex during pregnancy. *Journal of Women's Health*, *27*(1), 83–92. <https://doi.org/10.1089/jwh.2017.6408>
- Whiteley, L., Craker, L., Haubrick, K. K., Arnold, T., Mena, L., Olsen, E., & Brown, L. K. (2021). The impact of a mobile gaming intervention to increase adherence to pre-exposure prophylaxis. *AIDS and Behavior*, *25*(6), 1884–1889. <https://doi.org/10.1007/s10461-020-03118-3>
- Williams, S. P., Myles, R. L., Sperling, C. C., & Carey, D. (2018). An intervention for reducing the sexual risk of men released from jails. *Journal of Correctional Health Care*, *24*(1), 71–83. <https://doi.org/10.1177/1078345817745537>
- Wolitski, R. J., Gómez, C. A., & Parsons, J. T. (2005). Effects of a peer-led behavioral intervention to reduce HIV transmission and promote serostatus disclosure among HIV-

seropositive gay and bisexual men. *AIDS (London, England)*, *19 Suppl 1*, S99-109.

<https://doi.org/10.1097/01.aids.0000167356.94664.59>

Zule, W. A., Costenbader, E. C., Coomes, C. M., & Wechsberg, W. M. (2009). Effects of a hepatitis c virus educational intervention or a motivational intervention on alcohol use, injection drug use, and sexual risk behaviors among injection drug users. *American Journal of Public Health*, *99*(S1), S180–S186. <https://doi.org/10.2105/AJPH.2007.126854>

## Supplemental Analyses

### Difference-in-Differences Score Analyses

A potential concern with the use of pre-post comparisons is whether comparing change across conditions is affected by pooling conditions from studies that differ in samples and methodology. As outlined in the main text, we think that the strengths of using pre-post comparisons outweigh the downsides, but to ensure the robustness of our results, we repeated our analyses using difference-in-difference scores to compare across groups within the same study.

Unfortunately, although all included studies had a comparison group, many included studies did not include a study arm that had either no recommendation or only one recommendation. The reason for this is ethical considerations and the fact that HIV trials adopt a comparative efficacy approach and use stringent controls (Routman et al., 2010). Thus, analyzing if multiple-behavior interventions work better than single-intervention or passive controls reduced the number of included reports from 331 to 70 and the overall effect size count from 1364 to 361.

We calculated  $\Delta$  by taking the difference between the two effects (intervention – control), with positive effects representing an advantage of the multiple-behavior intervention relative to either a passive control or a single-behavior intervention. We calculated the variance of the effect size using the formula recommended by Huedo-Medina and Johnson (2011):  $v = ((n_1+n_2)/(n_1 \times n_2)) + ((d^2)/(2 \times (n_1+n_2)))$ . This change in the calculation of the variance increased the associated effect size variance by 38.0% on average.

First, the average effect size comparing between multiple-behavior interventions and single-behavior interventions was not statistically different from zero,  $b = 0.09$ ,  $SE = 0.15$ ,  $p = .554$ . A similar result was also found comparing multiple-behavior interventions with passive



controls,  $b = 0.12$ ,  $SE = 0.11$ ,  $p = .281$ . These results provided no confirmation that the two analytical approaches led to consistent results.

Second, we repeated our analyses as described in the main text. When looking at the differences in efficacy across levels of country development, we see the same negative association between the level of development and multiple-behavior intervention efficacy (see Table S2). However, the associated error increased, and the statistically significant results were found in HDI,  $b = -2.18$ ,  $SE = 0.91$ ,  $p = .031$ , and HAQ,  $b = -0.01$ ,  $SE = -0.00$ ,  $p = .038$ . This finding is not surprising given both the reduction in the size of the dataset and the increase in effect-size variance when compared to the analyses reported in the main text. However, the pattern of coefficients and overall results were consistent across all indicators and models, suggesting that our general conclusions are robust.

Third, the representation of MSM data in this subset of the dataset was particularly weak ( $k = 83$ ). The interaction patterns were the same for all countries and in the US,  $p > .100$ . Finally, we examined within the US reports whether the representation of disadvantaged groups was associated with negative results (see Table S4). These models predominantly show near zero effects, except for the marginally significant interaction with the percentages of Black participants. Therefore, the results mostly replicated the lack of results presented in the main analyses. In conclusion, the two different analytic methods produced comparable results.

### **Measurement-Level Analyses**

We first repeated the mean estimation of the effect sizes of three intervention types (see Table S5). Next, we repeated the key analyses of examining the differential effects of multiple-behavior intervention as a function of country development indices (see Table S6), the percentages of MSM, different racial/ethnic minorities, and different ages across all countries

(see Table S7) and in the U.S. (see Tables S8 and S9) using the measurement level data. The meta-regression models with Robust Variance Estimation were clustered by report and clustered by outcome. Following the same procedures as described in the main text, all results were with small-sample corrections. In short, the results using the measurement-level data were the same as those using the mean-level data, except for the interactions between multiple-behavior interventions and GDP per capita,  $p = .112$ .

## References

Huedo-Medina, T. B., & Johnson, B. T. (2011). *Estimating the standardized mean difference effect size and its variance from different data sources: A spreadsheet.*

Routman, J. S., Willig, J. H., Westfall, A. O., Abrams, S. R., Varshney, M., Adusumilli, S., Allison, J. J., Savage, K. G., Saag, M. S., & Mugavero, M. J. (2010). Comparative efficacy versus effectiveness of initial antiretroviral therapy in clinical trials versus routine care. *Clinical Infectious Diseases : An Official Publication of the Infectious Diseases Society of America*, 50(4), 574–584. <https://doi.org/10.1086/650004>

Table S2

*Differential Effects Related to Log GDP, GDP Per Capita, and HDI Based on the Models with  $\Delta d$*

| Variable                                         | Development indices            |           |                                |           |                                |           |                                |           |
|--------------------------------------------------|--------------------------------|-----------|--------------------------------|-----------|--------------------------------|-----------|--------------------------------|-----------|
|                                                  | Log GDP                        |           | GDP per capita                 |           | HDI                            |           | HAQ                            |           |
|                                                  | <i>b</i> (SE)                  | <i>df</i> |
|                                                  | (Cluster = 58, <i>k</i> = 318) |           | (Cluster = 58, <i>k</i> = 318) |           | (Cluster = 58, <i>k</i> = 318) |           | (Cluster = 59, <i>k</i> = 321) |           |
| Intercept                                        | 1.09 (0.76)                    | 11.47     | -0.33 (0.21)                   | 12.21     | -0.1 (0.27)                    | 7.82      | -0.11 (0.24)                   | 10.93     |
| Intervention type: MBI - SBI                     | 0.06 (1.52)                    | 15.89     | -0.01 (0.24)                   | 5.61      | 1.84* (0.79)                   | 11.92     | 0.85 <sup>†</sup> (0.42)       | 15.28     |
| Development index                                | -0.06 <sup>†</sup> (0.03)      | 12.03     | 0.00* (0.00)                   | 21.30     | -0.37 (0.35)                   | 6.60      | 0.00 (0.00)                    | 11.51     |
| Development index × Intervention type: MBI - SBI | -0.00 (0.05)                   | 18.24     | -0.00 (0.00)                   | 22.00     | -2.18* (0.91)                  | 13.44     | -0.01* (0.01)                  | 18.96     |
| <i>Covariates:</i>                               |                                |           |                                |           |                                |           |                                |           |
| Average age                                      | 0.02** (0.01)                  | 19.97     | 0.02** (0.01)                  | 20.96     | 0.01* (0.00)                   | 16.64     | 0.01* (0.01)                   | 21.79     |
| Percentages of females                           | 0.00 (0.00)                    | 17.74     | 0.00 (0.00)                    | 19.79     | 0.00 (0.00)                    | 17.62     | 0.00 (0.00)                    | 18.05     |
| Expert facilitator                               | -0.03 (0.13)                   | 23.02     | 0 (0.12)                       | 23.80     | 0.02 (0.11)                    | 20.28     | -0.04 (0.11)                   | 22.11     |
| Medical recruitment setting                      | 0.11 (0.12)                    | 27.25     | 0.03 (0.11)                    | 25.06     | 0.01 (0.09)                    | 24.45     | 0.08 (0.1)                     | 25.73     |
| Culturally appropriate                           | 0.18 <sup>†</sup> (0.09)       | 24.40     | 0.09 (0.1)                     | 22.34     | 0.02 (0.11)                    | 21.16     | 0.03 (0.11)                    | 22.37     |
| Modified covariate for potential biases          | 0.94 <sup>†</sup> (0.44)       | 7.62      | 1.02 <sup>†</sup> (0.44)       | 8.25      | 1.06* (0.41)                   | 7.52      | 0.87 <sup>†</sup> (0.43)       | 7.58      |
| <i>I</i> <sup>2</sup>                            | 95.29                          |           | 95.24                          |           | 94.91                          |           | 95.11                          |           |

*Note.* *b* = unstandardized coefficient; *SE* = standard error; *p* = *p* value; *k* = number of effect sizes used in each model; Log GDP = log form of a region's overall Gross Domestic Product; GDP per capita = overall Gross Domestic Product of a region divided by its total population; HDI = human development index; HAQ = healthcare access and quality index; average age = average age of the sample; percentages of females = percentages of female participants; expert facilitator = the intervention program was facilitated by experts (e.g., clinical psychologists); medical recruitment setting = participant recruited from medical settings; culturally appropriate = the intervention was culturally appropriate; clinical delivery setting = the intervention was delivered in clinical settings. *I*<sup>2</sup> = proportion of variance due to between-group heterogeneity.

<sup>†</sup> *p* < .10, \* *p* < .05, \*\* *p* < .01, \*\*\* *p* < .001

Table S3

*Differential Effects of Multiple-Behavior Interventions Related to Gay/bisexual or MSM Representation and Being Young Adults Across Countries: Models with  $\Delta d$*

| Variable                                                     | Disadvantaged group status         |           |                                |           |
|--------------------------------------------------------------|------------------------------------|-----------|--------------------------------|-----------|
|                                                              | Gay/bisexual or MSM representation |           | Young adult                    |           |
|                                                              | <i>b</i> ( <i>SE</i> )             | <i>df</i> | <i>b</i> ( <i>SE</i> )         | <i>df</i> |
|                                                              | (Cluster = 16, <i>k</i> = 83)      |           | (Cluster = 61, <i>k</i> = 337) |           |
| Intercept                                                    | -0.37 (1.91)                       | 2.07      | -0.4 (0.26)                    | 13.24     |
| Intervention type: MBI - SBI                                 | -0.14 (2.02)                       | 1.98      | -0.14 (0.47)                   | 22.06     |
| Disadvantaged group status                                   | -0.01 (0.02)                       | 2.01      | 0.01 (0.01)                    | 12.04     |
| Disadvantaged group status ×<br>Intervention type: MBI - SBI | 0.01 (0.03)                        | 2.15      | 0.01 (0.02)                    | 22.37     |
| <i>Covariates:</i>                                           |                                    |           |                                |           |
| Average age                                                  | 0.01 (0.02)                        | 3.18      | -                              | -         |
| Percentages of females                                       | 0.01 (0.03)                        | 2.5       | 0.00 (0.00)                    | 21.76     |
| Expert facilitator                                           | -0.02 (0.36)                       | 3.75      | 0.22 (0.15)                    | 27.06     |
| Medical recruitment setting                                  | 0.35 (0.82)                        | 3.92      | 0.22 (0.16)                    | 33.44     |
| Culturally appropriate                                       | 0.24 (0.32)                        | 2.76      | 0.03 (0.1)                     | 26.32     |
| Modified covariate for potential<br>biases                   | 1.75 (2.47)                        | 5.26      | 0.88 <sup>†</sup> (0.44)       | 8.57      |
| <i>F</i> <sup>2</sup>                                        | 96.13                              |           | 96.14                          |           |

*Note.* Report of the robust variance estimation meta-regression using single-behavior intervention as the reference (i.e., intercept). *b* = unstandardized coefficient; *SE* = standard error; *p* = *p* value; *k* = the number of effect sizes; gay/bisexual or MSM representation = percentage of gay/bisexual or MSM in the sample; average age = average age of the sample; percentages of females = percentages of female participants; expert facilitator = the intervention program was facilitated by experts (e.g., clinical psychologists); medical recruitment setting = participant recruited from medical settings; culturally appropriate = the intervention was culturally appropriate; clinical delivery setting = the intervention was delivered in clinical settings; *F*<sup>2</sup> = proportion of variance due to between-group heterogeneity.

<sup>†</sup> *p* < .10, \* *p* < .05, \*\* *p* < .01, \*\*\* *p* < .001

Table S4

*Differential Effects of Single and Multiple Intervention Type Related to Minority Groups in the U.S: Models with  $\Delta d$*

| Variable                                                     | Minority group status          |           |                                    |           |                                |           |
|--------------------------------------------------------------|--------------------------------|-----------|------------------------------------|-----------|--------------------------------|-----------|
|                                                              | Non-White representation       |           | Black representation               |           | Latinx representation          |           |
|                                                              | <i>b</i> ( <i>SE</i> )         | <i>df</i> | <i>b</i> ( <i>SE</i> )             | <i>df</i> | <i>b</i> ( <i>SE</i> )         | <i>df</i> |
|                                                              | (Cluster = 30, <i>k</i> = 181) |           | (Cluster = 26, <i>k</i> = 153)     |           | (Cluster = 24, <i>k</i> = 145) |           |
| Intercept                                                    | -1.21 (0.79)                   | 7.46      | -1.5 (0.78)                        | 5.27      | -0.8 (0.57)                    | 8.20      |
| Intervention type: MBI - SBI                                 | 0.69 (0.4)                     | 8.40      | 0.62 <sup>†</sup> (0.33)           | 7.52      | -0.02 (0.18)                   | 11.29     |
| Disadvantaged group status                                   | 0 (0)                          | 6.24      | 0.01 <sup>†</sup> (0.00)           | 5.58      | 0 (0)                          | 3.37      |
| Disadvantaged group status ×<br>Intervention type: MBI - SBI | -0.01 (0.01)                   | 9.19      | -0.01 <sup>†</sup> (0.01)          | 6.29      | 0 (0.01)                       | 3.84      |
| <i>Covariates:</i>                                           |                                |           |                                    |           |                                |           |
| Average age                                                  | 0.02 (0.01)                    | 10.86     | 0.02 <sup>†</sup> (0.01)           | 7.61      | 0.01 (0.01)                    | 9.24      |
| Percentages of females                                       | 0.01 (0)                       | 9.29      | 0.01 <sup>†</sup> (0)              | 10.23     | 0 (0.01)                       | 6.90      |
| Expert facilitator                                           | 0.44 <sup>†</sup> (0.22)       | 11.86     | 0.22 (0.2)                         | 6.43      | 0.16 (0.24)                    | 7.64      |
| Medical recruitment setting                                  | -0.17 (0.17)                   | 11.03     | -0.18 (0.19)                       | 7.69      | -0.03 (0.26)                   | 7.78      |
| Culturally appropriate                                       | -0.15 (0.22)                   | 9.73      | -0.09 (0.24)                       | 6.57      | 0.21 (0.27)                    | 7.19      |
| Modified covariate for potential biases                      | 2.08 (1.3)                     | 3.14      | 2.62 (1.2)                         | 2.28      | 2.63 (1.26)                    | 2.16      |
| <i>I</i> <sup>2</sup>                                        | 89.72                          |           | 89.16                              |           | 90.80                          |           |
| Variable                                                     | Other representation           |           | Gay/bisexual or MSM representation |           | Young adult                    |           |
|                                                              | <i>b</i> ( <i>SE</i> )         | <i>df</i> | <i>b</i> ( <i>SE</i> )             | <i>df</i> | <i>b</i> ( <i>SE</i> )         | <i>df</i> |
|                                                              | (Cluster = 20, <i>k</i> = 123) |           | (Cluster = 11, <i>k</i> = 55)      |           | (Cluster = 30, <i>k</i> = 181) |           |
| Intercept                                                    | -1.37 (0.85)                   | 6.12      | -2.88 (2.02)                       | 1.75      | -0.8 (0.54)                    | 9.71      |
| Intervention type: MBI - SBI                                 | 0.23 (0.29)                    | 6.62      | 3.9 (2.63)                         | 2.30      | -0.85 (0.68)                   | 8.47      |
| Disadvantaged group status                                   | 0.02 (0.02)                    | 2.48      | 0.03 (0.02)                        | 2.22      | 0.01 (0.01)                    | 8.47      |
| Disadvantaged group status ×<br>Intervention type: MBI - SBI | -0.03 (0.05)                   | 4.67      | -0.04 (0.03)                       | 2.32      | 0.03 (0.03)                    | 10.37     |
| <i>Covariates:</i>                                           |                                |           |                                    |           |                                |           |
| Average age                                                  | 0.02 (0.02)                    | 6.96      | 0.02 (0.03)                        | 1.87      | -                              | -         |
| Percentages of females                                       | 0 (0.01)                       | 7.29      | 0.05 (0.03)                        | 2.11      | 0.01 <sup>†</sup> (0)          | 6.71      |
| Expert facilitator                                           | 0.44 (0.29)                    | 5.38      | -0.35 (0.51)                       | 2.21      | 0.49 <sup>†</sup> (0.25)       | 7.19      |
| Medical recruitment setting                                  | -0.44 (0.29)                   | 5.25      | -0.64 (0.28)                       | 1.26      | -0.19 (0.22)                   | 12.53     |
| Culturally appropriate                                       | -0.16 (0.39)                   | 5.70      | 0.34 (0.44)                        | 1.66      | -0.19 (0.23)                   | 10.36     |
| Modified covariate for potential biases                      | 3.01 (1.42)                    | 1.53      | -1.65 (2.95)                       | 2.55      | 2.11 (1.35)                    | 3.03      |
| <i>I</i> <sup>2</sup>                                        | 94.02                          |           | 71.98                              |           | 89.81                          |           |

*Note.* *b* = unstandardized coefficient; *SE* = standard error; *p* = *p* value; *k* = number of unique groups in the analysis; ES = number of effect sizes used in each model; age = average age of the sample; percentages of females = percentages of female participants; expert facilitator = the intervention program was facilitated by experts (e.g., clinical psychologists); medical recruitment setting = participant recruited from medical settings; culturally appropriate = the intervention was culturally appropriate; clinical delivery setting = the intervention was delivered in clinical settings. *I*<sup>2</sup> is the proportion of variance due to between-study heterogeneity.

†  $p < .10$ , \*  $p < .05$ , \*\*  $p < .01$ , \*\*\*  $p < .001$

Table S5

*Mean Estimated Effect Sizes of Different Intervention Types (Cluster =*

*324,  $k = 2234$ )*

| Variable                       | $b$ ( $SE$ )  | $df$   |
|--------------------------------|---------------|--------|
| Single-behavior intervention   | 0.25* (0.11)  | 80.53  |
| Multiple-behavior intervention | 0.3*** (0.08) | 111.86 |
| Passive control                | 0.05 (0.09)   | 59.22  |
| $I^2$                          | 95.22         |        |

*Note.* Report of the robust variance estimation meta-regression using single-behavior intervention as the reference (i.e., intercept).  $b$  = unstandardized coefficient;  $SE$  = standard error;  $df$  = degrees of freedom;  $p$  =  $p$  value;  $k$  = number of effect sizes;  $I^2$  = proportion of variance due to between-group heterogeneity.

†  $p < .10$ , \*  $p < .05$ , \*\*  $p < .01$ , \*\*\*  $p < .001$



Table S6

*Differential Effects of Multiple-Behavior Interventions Related to Country Log GDP, GDP Per Capita, HDI, and HAQ*

| Variable                                   | Development indices              |           |                                  |           |                                  |           |                                  |           |
|--------------------------------------------|----------------------------------|-----------|----------------------------------|-----------|----------------------------------|-----------|----------------------------------|-----------|
|                                            | Log GDP                          |           | GDP per capita                   |           | HDI                              |           | HAQ                              |           |
|                                            | <i>b</i> ( <i>SE</i> )           | <i>df</i> |
|                                            | (Cluster = 278, <i>k</i> = 1934) |           | (Cluster = 278, <i>k</i> = 1934) |           | (Cluster = 276, <i>k</i> = 1926) |           | (Cluster = 282, <i>k</i> = 1969) |           |
| Intercept                                  | -1.08 (0.74)                     | 28.54     | -0.17 (0.18)                     | 66.30     | -0.73 <sup>†</sup> (0.38)        | 20.02     | -0.43 (0.26)                     | 27.53     |
| Intervention type: MBI                     | 2.51* (0.96)                     | 51.79     | 0.2 (0.14)                       | 56.51     | 1.48** (0.48)                    | 32.79     | 0.87** (0.31)                    | 38.99     |
| Intervention type: PC                      | 0.65 (0.96)                      | 34.37     | -0.03 (0.16)                     | 41.57     | 0.5 (0.48)                       | 21.79     | 0.19 (0.33)                      | 23.29     |
| Development index                          | 0.03 (0.03)                      | 31.84     | 0.00 (0.00)                      | 36.60     | 0.77 (0.48)                      | 20.49     | 0.01 (0.00)                      | 27.73     |
| Development index × Intervention type: MBI | -0.09* (0.03)                    | 56.68     | 0.00 (0.00)                      | 66.70     | -1.79** (0.58)                   | 39.37     | -0.01** (0)                      | 52.24     |
| Development index × Intervention type: PC  | -0.03 (0.03)                     | 39.27     | 0.00 (0.00)                      | 58.39     | -0.76 (0.59)                     | 28.20     | -0.00 (0.00)                     | 33.18     |
| <i>Covariates:</i>                         |                                  |           |                                  |           |                                  |           |                                  |           |
| Average age                                | 0.01** (0.00)                    | 97.24     | 0.01** (0.00)                    | 100.74    | 0.01*** (0.00)                   | 96.92     | 0.01** (0.00)                    | 103.05    |
| Percentages of females                     | -0.00 (0.00)                     | 117.48    | -0.00 (0.00)                     | 119.53    | -0.00 (0.00)                     | 117.08    | -0.00 (0.00)                     | 120.10    |
| Expert facilitator                         | 0.14* (0.07)                     | 144.97    | 0.16* (0.07)                     | 151.56    | 0.14* (0.06)                     | 144.90    | 0.12 <sup>†</sup> (0.06)         | 147.37    |
| Medical recruitment setting                | 0.01 (0.06)                      | 157.12    | 0.02 (0.06)                      | 156.06    | 0.01 (0.06)                      | 155.56    | 0.04 (0.06)                      | 160.18    |
| Culturally appropriate                     | -0.04 (0.06)                     | 102.16    | -0.05 (0.07)                     | 103.10    | -0.05 (0.07)                     | 101.66    | -0.06 (0.07)                     | 100.69    |
| Modified covariate for potential biases    | 0.36 (0.34)                      | 30.86     | 0.39 (0.35)                      | 30.83     | 0.39 (0.34)                      | 30.53     | 0.32 (0.32)                      | 32.10     |
| <i>I</i> <sup>2</sup>                      | 95.21                            |           | 95.26                            |           | 95.13                            |           | 95.17                            |           |

*Note.* Log GDP = the log form of a country's overall gross domestic product; GDP per capita = overall gross domestic product of a country divided by its total population; HDI = human development index; HAQ = healthcare access and quality index; *b* = unstandardized coefficient; *SE* = standard error; *df* = degrees of freedom; *p* = *p* value; *k* = total number of effect sizes; average age = average age of the sample; percentages of females = percentages of female participants; expert facilitator = the intervention program was facilitated by experts (e.g., clinical psychologists); medical recruitment setting = participant recruited from medical settings; culturally appropriate = the intervention was culturally appropriate; clinical delivery setting = the intervention was delivered in clinical settings. *I*<sup>2</sup> = proportion of variance due to between-group heterogeneity.

<sup>†</sup> *p* < .10, \* *p* < .05, \*\* *p* < .01, \*\*\* *p* < .001

Table S7

*Differential Effects of Multiple-Behavior Interventions Related to MSM Representation and Being Young Adults Across Countries*

| Variable                                               | Disadvantaged group status         |           |                                  |           |
|--------------------------------------------------------|------------------------------------|-----------|----------------------------------|-----------|
|                                                        | Gay/bisexual or MSM representation |           | Young adult                      |           |
|                                                        | <i>b</i> ( <i>SE</i> )             | <i>df</i> | <i>b</i> ( <i>SE</i> )           | <i>df</i> |
|                                                        | (Cluster = 89, <i>k</i> = 787)     |           | (Cluster = 300, <i>k</i> = 2090) |           |
| Intercept                                              | -0.25 (0.23)                       | 9.40      | -0.1 (0.3)                       | 30.21     |
| Intervention type: MBI                                 | 0.57* (0.18)                       | 8.86      | 0.17 (0.29)                      | 41.97     |
| Intervention type: PC                                  | 0.55 <sup>†</sup> (0.3)            | 9.85      | -0.03 (0.33)                     | 38.02     |
| Disadvantaged group status                             | 0.00 (0.00)                        | 11.48     | 0.01 (0.01)                      | 31.81     |
| Disadvantaged group status ×<br>Intervention type: MBI | -0.01* (0)                         | 18.44     | -0.00 (0.01)                     | 51.92     |
| Disadvantaged group status ×<br>Intervention type: PC  | -0.01* (0)                         | 14.13     | -0.00 (0.01)                     | 30.98     |
| <i>Covariates:</i>                                     |                                    |           |                                  |           |
| Average age                                            | 0.00 (0.00)                        | 27.37     | -                                | -         |
| Percentages of females                                 | -0.00 <sup>†</sup> (0.00)          | 22.38     | -0.00 (0.00)                     | 129.10    |
| Expert facilitator                                     | 0.05 (0.12)                        | 41.33     | 0.17* (0.07)                     | 161.54    |
| Medical recruitment setting                            | 0.17 (0.15)                        | 33.45     | 0.08 (0.06)                      | 171.90    |
| Culturally appropriate                                 | 0.09 (0.09)                        | 20.71     | -0.04 (0.06)                     | 109.10    |
| Modified covariate for potential biases                | 0.77* (0.32)                       | 15.42     | 0.25 (0.31)                      | 34.16     |
| <i>I</i> <sup>2</sup>                                  | 89.53                              |           | 95.15                            |           |

*Note.* Report of the robust variance estimation meta-regression using single-behavior intervention as the reference (i.e., intercept). *b* = unstandardized coefficient; *SE* = standard error; *p* = *p* value; *k* = the number of effect sizes; gay/bisexual or MSM representation = percentage of MSM in the sample; average age = average age of the sample; percentages of females = percentages of female participants; expert facilitator = the intervention program was facilitated by experts (e.g., clinical psychologists); medical recruitment setting = participant recruited from medical settings; culturally appropriate = the intervention was culturally appropriate; clinical delivery setting = the intervention was delivered in clinical settings; *I*<sup>2</sup> = proportion of variance due to between-group heterogeneity.

<sup>†</sup> *p* < .10, \* *p* < .05, \*\* *p* < .01, \*\*\* *p* < .001

Table S8

*Differential Effects of Multiple-Behavior Interventions Related to Minority Group Status and Being Young Adults in the US*

| Variable                                               | Minority group status            |           |                                    |           |                                  |           |
|--------------------------------------------------------|----------------------------------|-----------|------------------------------------|-----------|----------------------------------|-----------|
|                                                        | Non-White representation         |           | Black representation               |           | Latinx representation            |           |
|                                                        | <i>b (SE)</i>                    | <i>df</i> | <i>b (SE)</i>                      | <i>df</i> | <i>b (SE)</i>                    | <i>df</i> |
|                                                        | (Cluster = 174, <i>k</i> = 1235) |           | (Cluster = 151, <i>k</i> = 974)    |           | (Cluster = 139, <i>k</i> = 945)  |           |
| Intercept                                              | 0.1 (0.18)                       | 19.47     | -0.12 (0.23)                       | 28.63     | -0.02 (0.31)                     | 33.92     |
| Intervention type: MBI                                 | -0.26 (0.16)                     | 16.16     | -0.16 (0.2)                        | 27.32     | -0.28 (0.19)                     | 28.80     |
| Intervention type: PC                                  | -0.24 (0.25)                     | 9.82      | -0.53 <sup>†</sup> (0.26)          | 14.91     | -0.22 (0.26)                     | 18.09     |
| Disadvantaged group status                             | 0.00 (0.00)                      | 14.65     | 0.00 (0.00)                        | 14.73     | -0.01 (0.01)                     | 3.27      |
| Disadvantaged group status ×<br>Intervention type: MBI | 0.00 (0.00)                      | 21.52     | 0.00 (0.00)                        | 22.18     | 0.01 (0.01)                      | 5.53      |
| Disadvantaged group status ×<br>Intervention type: PC  | 0.00 (0.00)                      | 16.24     | 0.01 (0.01)                        | 22.71     | 0.00 (0.01)                      | 2.79      |
| <i>Covariates:</i>                                     |                                  |           |                                    |           |                                  |           |
| Average age                                            | 0.01** (0)                       | 54.34     | 0.01** (0.00)                      | 68.10     | 0.01* (0.00)                     | 58.79     |
| Percentages of females                                 | 0.00 (0.00)                      | 55.99     | 0.00 (0.00)                        | 50.05     | 0.00 (0.00)                      | 49.89     |
| Expert facilitator                                     | 0.1 (0.06)                       | 82.67     | 0.07 (0.08)                        | 69.65     | 0.14 (0.08)                      | 64.52     |
| Medical recruitment setting                            | 0.02 (0.06)                      | 79.21     | -0.01 (0.07)                       | 70.58     | 0.00 (0.07)                      | 63.66     |
| Culturally appropriate                                 | 0.01 (0.07)                      | 46.74     | 0.02 (0.07)                        | 42.24     | 0.00 (0.09)                      | 41.11     |
| Modified covariate for potential<br>biases             | 0.53 (0.41)                      | 21.99     | 0.74 (0.52)                        | 17.80     | 0.81 (0.54)                      | 17.48     |
| <i>I</i> <sup>2</sup>                                  | 94.19                            |           | 94.14                              |           | 94.55                            |           |
| Variable                                               | Other representation             |           | Gay/bisexual MSM<br>representation |           | Young adult                      |           |
|                                                        | <i>b (SE)</i>                    | <i>df</i> | <i>b (SE)</i>                      | <i>df</i> | <i>b (SE)</i>                    | <i>df</i> |
|                                                        | (Cluster = 138, <i>k</i> = 916)  |           | (Cluster = 59, <i>k</i> = 510)     |           | (Cluster = 174, <i>k</i> = 1235) |           |
| Intercept                                              | -0.09 (0.29)                     | 41.28     | -0.09 (0.22)                       | 4.28      | -0.33 (0.45)                     | 16.06     |
| Intervention type: MBI                                 | -0.09 (0.17)                     | 28.44     | 0.29 <sup>†</sup> (0.14)           | 7.49      | 0.20 (0.40)                      | 19.40     |
| Intervention type: PC                                  | -0.05 (0.25)                     | 17.24     | 0.17 (0.57)                        | 4.61      | 0.23 (0.43)                      | 22.08     |
| Disadvantaged group status                             | 0.00 (0.01)                      | 2.29      | 0.00 <sup>†</sup> (0.00)           | 6.45      | 0.02 (0.01)                      | 18.21     |
| Disadvantaged group status ×<br>Intervention type: MBI | 0.00 (0.01)                      | 5.06      | 0.00 <sup>†</sup> (0.00)           | 13.61     | -0.01 (0.01)                     | 28.26     |
| Disadvantaged group status ×<br>Intervention type: PC  | -0.01 (0.01)                     | 3.57      | 0.00 (0.01)                        | 5.93      | -0.01 (0.01)                     | 22.68     |
| <i>Covariates:</i>                                     |                                  |           |                                    |           |                                  |           |
| Average age                                            | 0.01* (0.00)                     | 50.53     | -0.01 (0.00)                       | 15.97     | -                                | -         |
| Percentages of females                                 | 0.00 (0.00)                      | 50.70     | 0.00 (0.00)                        | 9.06      | 0.00 (0.00)                      | 57.25     |
| Expert facilitator                                     | 0.1 (0.08)                       | 71.61     | 0.18* (0.08)                       | 21.66     | 0.1 (0.06)                       | 85.95     |
| Medical recruitment setting                            | 0.02 (0.08)                      | 65.29     | -0.02 (0.08)                       | 17.11     | 0.03 (0.06)                      | 71.26     |
| Culturally appropriate                                 | -0.04 (0.1)                      | 42.79     | 0.00 (0.11)                        | 6.73      | 0 (0.07)                         | 42.70     |
| Modified covariate for potential<br>biases             | 0.71 (0.6)                       | 15.18     | 0.99** (0.27)                      | 9.64      | 0.48 (0.39)                      | 23.69     |

---

|       |       |       |       |
|-------|-------|-------|-------|
| $I^2$ | 95.08 | 88.34 | 94.22 |
|-------|-------|-------|-------|

---

*Note.* Report of the robust variance estimation meta-regression using single-behavior intervention as the reference (i.e., intercept).  $b$  = unstandardized coefficient;  $SE$  = standard error;  $df$  = degrees of freedom;  $p$  =  $p$  value;  $k$  = the number of effect sizes; average age = average age of the sample; percentages of females = percentages of female participants; expert facilitator = the intervention program was facilitated by experts (e.g., clinical psychologists); medical recruitment setting = participant recruited from medical settings; culturally appropriate = the intervention was culturally appropriate; clinical delivery setting = the intervention was delivered in clinical settings;  $I^2$  = proportion of variance due to between-group heterogeneity.

†  $p < .10$ , \*  $p < .05$ , \*\*  $p < .01$ , \*\*\*  $p < .001$

Table S9

*Differential Effects of Multiple-Behavior Interventions Related to Intersectionality of Racial/Ethnic Minority and MSM Representation in the US*

| Variable                                      | Minority group status          |           |                                |           |                                |           |
|-----------------------------------------------|--------------------------------|-----------|--------------------------------|-----------|--------------------------------|-----------|
|                                               | Non-White representation       |           | Black representation           |           | Latinx representation          |           |
|                                               | <i>b</i> ( <i>SE</i> )         | <i>df</i> | <i>b</i> ( <i>SE</i> )         | <i>df</i> | <i>b</i> ( <i>SE</i> )         | <i>df</i> |
|                                               | (Cluster = 98, <i>k</i> = 732) |           | (Cluster = 85, <i>k</i> = 562) |           | (Cluster = 80, <i>k</i> = 594) |           |
| Intercept                                     | 0.29 (0.57)                    | 12.85     | -0.35 (0.56)                   | 16.53     | -0.56 (0.41)                   | 20.26     |
| MSM representation                            | -9.2 (10.12)                   | 12.06     | -2.13 (9.21)                   | 14.96     | 2.65 (5.65)                    | 19.95     |
| Minority group status                         | 0.00 (0.01)                    | 12.61     | 0.00 (0.01)                    | 12.70     | 0.00 (0.01)                    | 9.18      |
| MSM representation ×<br>Minority group status | 0.06 (0.13)                    | 15.77     | 0.01 (0.14)                    | 13.93     | 0.04 (0.23)                    | 7.91      |
| <i>Covariates:</i>                            |                                |           |                                |           |                                |           |
| Average age                                   | 0.01* (0)                      | 23.48     | 0.01* (0)                      | 29.71     | 0.01** (0)                     | 39.44     |
| Percentages of females                        | 0 (0)                          | 33.85     | 0 (0)                          | 31.09     | 0 (0)                          | 31.86     |
| Expert facilitator                            | 0.04 (0.06)                    | 47.47     | -0.02 (0.08)                   | 40.56     | 0.06 (0.08)                    | 37.64     |
| Medical recruitment<br>setting                | -0.01 (0.07)                   | 44.84     | -0.09 (0.09)                   | 42.21     | -0.10 (0.08)                   | 37.95     |
| Culturally appropriate                        | -0.02 (0.08)                   | 28.94     | 0.05 (0.09)                    | 27.91     | 0.10 (0.09)                    | 26.67     |
| Modified covariate for<br>potential biases    | 1.09 <sup>†</sup> (0.54)       | 17.61     | 1.51* (0.61)                   | 12.78     | 1.54* (0.64)                   | 13.06     |
| <i>I</i> <sup>2</sup>                         | 91.29                          |           | 91.50                          |           | 91.12                          |           |

*Note.* Report of the robust variance estimation meta-regression using single-behavior intervention as the reference (i.e., intercept). *b* = unstandardized coefficient; *SE* = standard error; *df* = degrees of freedom; *p* = *p* value; *k* = the number of effect sizes; average age = average age of the sample; percentages of females = percentages of female participants; expert facilitator = the intervention program was facilitated by experts (e.g., clinical psychologists); medical recruitment setting = participant recruited from medical settings; culturally appropriate = the intervention was culturally appropriate; clinical delivery setting = the intervention was delivered in clinical settings; *I*<sup>2</sup> = proportion of variance due to between-group heterogeneity.

<sup>†</sup> *p* < .10, \* *p* < .05, \*\* *p* < .01, \*\*\* *p* < .001

Table S10

*Differential Effects of Multiple-Behavior Interventions Related to Related to MSM**Representation Controlling for Methodological Characteristics*

| Variable                                            | Gay/bisexual or MSM representation |           |
|-----------------------------------------------------|------------------------------------|-----------|
|                                                     | <i>b</i> ( <i>SE</i> )             | <i>df</i> |
|                                                     | (Cluster = 87, <i>k</i> = 410)     |           |
| Intercept                                           | -0.39 (0.22)                       | 8.84      |
| Intervention type: MBI                              | 0.33 <sup>†</sup> (0.17)           | 10.07     |
| Intervention type: PC                               | 0.51 <sup>†</sup> (0.27)           | 9.14      |
| Disadvantaged group status                          | 0.00 (0.00)                        | 13.88     |
| Disadvantaged group status × Intervention type: MBI | -0.01 <sup>†</sup> (0.00)          | 18.63     |
| Disadvantaged group status × Intervention type: PC  | -0.01* (0.00)                      | 13.65     |
| <i>Covariates:</i>                                  |                                    |           |
| Average age                                         | 0.00* (0.00)                       | 25.69     |
| Percentages of females                              | 0.11 (0.10)                        | 31.37     |
| Expert facilitator                                  | 0.12 (0.13)                        | 29.43     |
| Medical recruitment setting                         | -0.02 (0.09)                       | 16.46     |
| Culturally appropriate                              | 0.21** (0.07)                      | 15.23     |
| Target outcome                                      | 0.32** (0.09)                      | 28.35     |
| Target gender                                       | 0.78* (0.37)                       | 23.06     |
| Modified covariate for potential biases             | 0.00* (0.00)                       | 25.69     |
| <i>I</i> <sup>2</sup>                               | 84.07                              |           |

*Note.* Report of the robust variance estimation meta-regression using single-behavior intervention as the reference (i.e., intercept). *b* = unstandardized coefficient; *SE* = standard error; *df* = degrees of freedom; *p* = *p* value; *k* = number of effect sizes; *I*<sup>2</sup> = proportion of variance due to between-group heterogeneity.

<sup>†</sup> *p* < .10, \* *p* < .05, \*\* *p* < .01, \*\*\* *p* < .001
